# Supplementary material for: Vessel Wall-Derived Mesenchymal Stromal Cells Share Similar Differentiation Potential and Immunomodulatory Properties with Bone Marrow-Derived Stromal Cells
Source: Hindawi journal article supplement (doi:10.1155/2020/8847038), 2020-10-21

Supplementary figure 1.

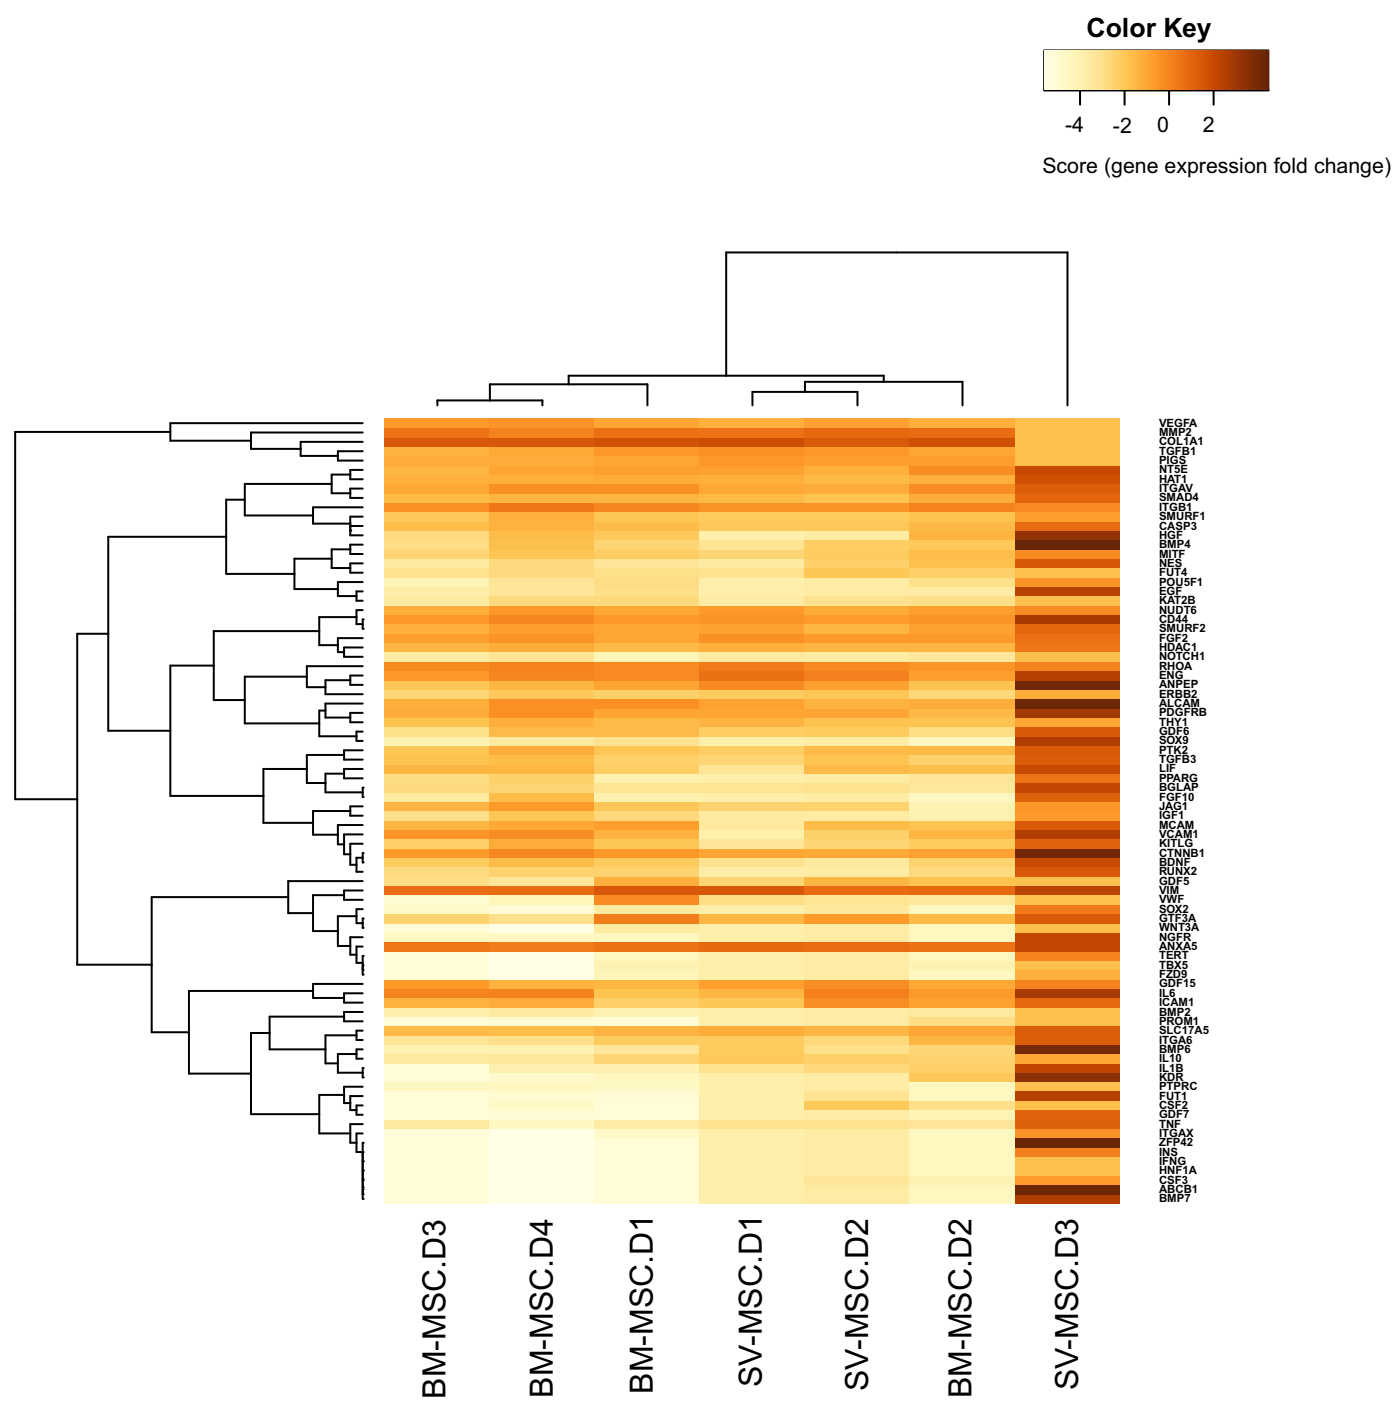

Supplement: f1 [file 8847038.f1.pdf]
